# Supplementary material for: Population genetic structure and hybrid zone analyses for species delimitation in the Japanese toad (Bufo japonicus)
Source: PeerJ. 2023 Oct 24;11:e16302. doi: 10.7717/peerj.16302 (PMC10607272; doi:10.7717/peerj.16302)
Supplement: Supplemental Information 4 — Origin of samples analyzed in this study, including information on vouchers (KUHE Graduate School of Human and Environmental Studies, Kyoto University), GenBank accession numbers for mtDNA, mtDNA clade/species, DDBJ accession number for SNPs, and cluster estimated by DAPC (K = 5). In addition, whether these samples were included in library 1 or 2 and included in each dataset and sub-dataset for analyses (×: sub-selected for dataset and sub-dataset). [file peerj-11-16302-s004.xlsx]

## Sheet: Sheet1
Species	Sample ID	Voucher (KUHE)	Country	Prefecture	Locality	mtDNA, Genbank accession No.	mtDNA clade/species	Mig-seq library	SNPs, DDBJ Biosample accession No.	Cluster estimaed by DAPC on dataset I (K = 5)	Dataset for SNAPP and mtDNA phylogeny	Dataset I	Dataset I-2	Dataset II	Dataset II-2	Dataset III	Dataset III-2	Sub-dataset I	Sub-dataset II	Sub-dataset III	Sub-dataset III-2
B. formosus	AGP4	KUHE:TMP_20140423-5	Japan	Tochigi	Sano	LC581513	NF	Lib. 1	SAMD00622809	NF	-	×	×	×	×	×	×	×	-	-	-
hybrid	AKA1	KUHE:28921	Japan	Kanagawa	Atsugi	LC581515	EJ	Lib. 1	SAMD00622810	-	-	-	-	-	-	×	×	-	-	-	-
B. japonicus	AKA5	KUHE:30658	Japan	Kochi	Tosashimizu	LC581519	EJ	Lib. 1	SAMD00622811	EJ	-	×	×	×	×	×	×	-	-	×	-
B. japonicus	AKA6	KUHE:40176	Japan	Kochi	Agawa	LC581520	EJ	Lib. 1	SAMD00622812	EJ	-	×	×	×	×	×	×	-	-	×	-
B. torrenticola	AKA7	KUHE:TMP_S1090	Japan	Nara	Kamikitayama	LC581521	B. torrenticola	Lib. 1	SAMD00622813	B. torrenticola	-	×	×	-	-	-	-	-	-	-	-
hybrid	AKE1	KUHE:59047	Japan	Kyoto	Kyoto	LC581527	EJ	Lib. 1	SAMD00622814	EJ	-	×	×	×	×	×	×	-	×	-	-
B. japonicus	AKK3	KUHE:48111	Japan	Shimane	Unnan	LC581538	EJ	Lib. 1	SAMD00622815	EJ	-	×	×	×	×	×	×	-	×	×	×
B. japonicus	AKK4	KUHE:46529	Japan	Shimane	Izumo	LC581539	EJ	Lib. 1	SAMD00622816	EJ	-	×	×	×	×	×	×	-	×	×	×
B. japonicus	AKK5	KUHE:36833	Japan	Tottori	Daisen	LC581540	EJ	Lib. 1	SAMD00622817	EJ	-	×	×	×	×	×	×	-	×	×	×
B. japonicus	AKK6	KUHE:36832	Japan	Okayama	Mimasaka	LC581541	EJ	Lib. 1	SAMD00622818	EJ	-	×	×	×	×	×	×	-	×	×	×
B. japonicus	AKK7	KUHE:37045	Japan	Okayama	Kagamino	LC581542	EJ	Lib. 1	SAMD00622819	EJ	×	×	×	×	×	×	×	-	×	×	×
B. japonicus	AKL0	KUHE:30055	Japan	Hyogo	Awaji	LC581545	EJ	Lib. 1	SAMD00622820	EJ	×	×	×	×	×	×	×	-	×	×	-
B. japonicus	AKM1	KUHE:59342	Japan	Kyoto	Kyoto	-	-	Lib. 1	SAMD00622821	EJ	-	×	×	×	×	×	×	-	×	×	×
B. torrenticola	AKQ9	KUHE:TMP_T3736	Japan	Shiga	Takashima	LC581549	B. torrenticola	Lib. 1	SAMD00622822	B. torrenticola	-	×	×	-	-	-	-	-	-	-	-
B. formosus	AKR4	KUHE:29388	Japan	Nara	Totsukawa	LC581553	SF	Lib. 1	SAMD00622823	SF	-	×	×	×	×	×	×	×	×	-	-
B. japonicus	AKR5	KUHE:24065	Japan	Osaka	Izumi	LC581554	EJ	Lib. 1	SAMD00622824	EJ	-	×	×	×	×	×	×	-	×	×	×
B. japonicus	AKR6	KUHE:24521	Japan	Osaka	Hannan	LC581555	EJ	Lib. 1	SAMD00622825	EJ	-	×	×	×	×	×	×	-	×	×	×
hybrid	AKR7	KUHE:42180	Japan	Wakayama	Hidakagawa	LC581556	EJ	Lib. 1	SAMD00622826	SF	-	×	×	×	×	×	×	-	×	-	-
B. formosus	AKS3	KUHE:TMP_T3347	Japan	Mie	Matsusaka	LC581561	SF	Lib. 1	SAMD00622827	SF	×	×	×	×	×	×	×	×	×	-	-
B. formosus	AKS5	KUHE:32020	Japan	Aichi	Shitara	LC581562	SF	Lib. 1	SAMD00622828	SF	×	×	×	×	×	×	×	×	×	-	-
B. torrenticola	AKS7	KUHE:34976	Japan	Shiga	Higashiomi	LC581564	B. torrenticola	Lib. 1	SAMD00622829	B. torrenticola	-	×	×	-	-	-	-	-	-	-	-
B. torrenticola	AKX2	KUHE:56747	Japan	Shiga	Takashima	LC581566	B. torrenticola	Lib. 1	SAMD00622830	B. torrenticola	×	×	×	-	-	-	-	-	-	-	-
B. japonicus	AKX3	KUHE:58938	Japan	Shiga	Otsu	LC581567	EJ	Lib. 1	SAMD00622831	EJ	-	×	×	×	×	×	×	-	×	×	×
B. torrenticola	AKY1	KUHE:24066	Japan	Kyoto	Kyoto	LC581573	B. torrenticola	Lib. 1	SAMD00622832	B. torrenticola	×	×	×	-	-	-	-	-	-	-	-
B. torrenticola	AKY3	KUHE:56750	Japan	Wakayama	Tanabe	LC581575	B. torrenticola	Lib. 1	SAMD00622833	B. torrenticola	-	×	×	-	-	-	-	-	-	-	-
B. torrenticola	AKY5	KUHE:27085	Japan	Mie	Matsusaka	LC581577	B. torrenticola	Lib. 1	SAMD00622834	B. torrenticola	-	×	×	-	-	-	-	-	-	-	-
B. torrenticola	AKY9	KUHE:40364	Japan	Fukui	Ikeda	LC581580	B. torrenticola	Lib. 1	SAMD00622835	B. torrenticola	×	×	×	-	-	-	-	-	-	-	-
B. torrenticola	AKZ4	KUHE:36024	Japan	Gifu	Ibigawa	LC581585	B. torrenticola	Lib. 1	SAMD00622836	B. torrenticola	×	×	×	-	-	-	-	-	-	-	-
B. torrenticola	AKZ8	KUHE:36670	Japan	Ishikawa	Kanazawa	LC581588	SF	Lib. 1	SAMD00622837	B. torrenticola	-	×	×	-	-	-	-	-	-	-	-
B. torrenticola	ALA1	KUHE:TMP_T3061	Japan	Toyama	Nanto	LC581590	SF	Lib. 1	SAMD00622838	B. torrenticola	-	×	×	-	-	-	-	-	-	-	-
B. japonicus	ALA2	KUHE:TMP_T3294	Japan	Hyogo	Toyooka	LC581591	EJ	Lib. 1	SAMD00622839	EJ	-	×	×	×	×	×	×	-	×	×	×
B. formosus	ALB4	KUHE:36533	Japan	Gifu	Ogaki	LC581592	SF	Lib. 1	SAMD00622840	SF	-	×	×	×	×	×	×	×	×	-	-
B. formosus	ALC0	KUHE:40438	Japan	Fukui	Ikeda	LC581596	SF	Lib. 1	SAMD00622841	SF	-	×	×	×	×	×	×	×	×	-	-
B. formosus	ALC7	KUHE:42071	Japan	Gifu	Takayama	LC581602	SF	Lib. 1	SAMD00622842	SF	-	×	×	×	×	×	×	×	×	-	-
B. formosus	ALC8	KUHE:42147	Japan	Gifu	Ibigawa	LC581603	SF	Lib. 1	SAMD00622843	SF	-	×	×	-	-	-	-	-	-	-	-
B. formosus	ALD0	KUHE:TMP_T3600	Japan	Gifu	Tajimi	LC581604	SF	Lib. 1	SAMD00622844	SF	×	×	×	×	×	×	×	×	×	-	-
B. formosus	ALD2	KUHE:56769	Japan	Ishikawa	Hakusan	LC581606	SF	Lib. 1	SAMD00622845	SF	-	×	×	×	×	×	×	×	×	-	-
B. formosus	ALD6	KUHE:30677	Japan	Niigata	Itoigawa	LC581610	SF	Lib. 1	SAMD00622846	SF	-	×	×	×	×	×	×	×	-	-	-
B. formosus	ALD7	KUHE:56048	Japan	Niigata	Minamiuonuma	LC581611	SF	Lib. 1	SAMD00622847	NF	-	×	×	×	×	×	×	×	-	-	-
B. formosus	ALG5	KUHE:59594	Japan	Kyoto	Ujitawara	LC581615	SF	Lib. 1	SAMD00622848	SF	-	×	×	×	×	×	×	×	×	-	-
hybrid	ALG6	KUHE:59624	Japan	Kyoto	Nantan	LC581616	SF	Lib. 1	SAMD00622849	SF	-	×	×	×	×	×	×	-	×	-	-
B. formosus	ALG9	KUHE:26572	Japan	Nagano	Kiso	LC581618	SF	Lib. 1	SAMD00622850	SF	×	×	×	×	×	×	×	×	×	-	-
B. formosus	ALH0	KUHE:32662	Japan	Nagano	Ina	LC581619	SF	Lib. 1	SAMD00622851	SF	-	×	×	×	×	×	×	×	×	-	-
B. formosus	ALH2	KUHE:46513	Japan	Nagano	Nagano	LC581620	SF	Lib. 1	SAMD00622852	SF	-	×	×	×	×	×	×	×	-	-	-
B. formosus	ALH3	KUHE:24414	Japan	Gifu	Nakatsugawa	LC581621	SF	Lib. 1	SAMD00622853	SF	-	×	×	×	×	×	×	×	×	-	-
B. formosus	ALH5	KUHE:55120	Japan	Nagano	Karuizawa	LC581623	SF	Lib. 1	SAMD00622854	NF	-	×	×	×	×	×	×	×	-	-	-
B. japonicus	ALH7	KUHE:59644	Japan	Hiroshima	Akitakata	LC581624	EJ	Lib. 1	SAMD00622855	EJ	×	×	×	×	×	×	×	-	×	×	×
hybrid	ALH9	KUHE:32002	Japan	Tokyo	Oshima	LC581626	EJ	Lib. 1	SAMD00622856	-	-	-	-	-	-	×	×	-	-	-	-
B. formosus	ALI1	KUHE:43353	Japan	Gunma	Minakami	LC581628	SF	Lib. 1	SAMD00622857	NF	-	×	×	×	×	×	×	×	-	-	-
B. formosus	ALI3	KUHE:46176	Japan	Chiba	Ichihara	LC581629	SF	Lib. 1	SAMD00622858	NF	-	×	×	×	×	×	×	×	-	-	-
B. formosus	ALI6	KUHE:59383	Japan	Shizuoka	Shizuoka	LC581631	SF	Lib. 1	SAMD00622859	SF	-	×	×	×	×	×	×	×	-	-	-
B. formosus	ALI8	KUHE:21647	Japan	Fukushima	Shirakawa	LC581632	NF	Lib. 1	SAMD00622860	NF	-	×	×	×	×	×	×	×	-	-	-
B. formosus	ALJ1	KUHE:45519	Japan	Miyagi	Sendai	LC581634	NF	Lib. 1	SAMD00622861	NF	×	×	×	×	×	×	×	×	-	-	-
B. formosus	ALJ4	KUHE:35275	Japan	Iwate	Ichinoseki	LC581637	NF	Lib. 1	SAMD00622862	NF	-	×	×	×	×	×	×	×	-	-	-
B. formosus	ALJ5	KUHE:TMP_T3127	Japan	Akita	Kitaakita	LC581638	NF	Lib. 1	SAMD00622863	NF	-	×	×	×	×	×	×	×	-	-	-
B. japonicus	ALJ8	KUHE:45123	Japan	Kagoshima	Tanegashima	LC581641	WJ	Lib. 1 and 2	SAMD00622864 and SAMD00622865	WJ	×	×	×	×	×	×	×	-	-	×	×
B. japonicus	ALJ9	KUHE:32078	Japan	Kagoshima	Kanoya	LC581642	WJ	Lib. 2	SAMD00622866	WJ	-	×	×	×	×	×	×	-	-	×	×
B. japonicus	ALK0	KUHE:24067	Japan	Miyazaki	Takachiho	LC581643	WJ	Lib. 1	SAMD00622867	WJ	-	×	×	×	×	×	×	-	-	×	×
B. japonicus	ALK2	KUHE:TMP_S906	Japan	Oita	Kunisaki	LC581645	WJ	Lib. 2	SAMD00622868	WJ	-	×	×	×	×	×	×	-	-	×	×
B. japonicus	ALK5	KUHE:22348	Japan	Tokushima	Kamiyama	LC581648	EJ	Lib. 1	SAMD00622869	EJ	-	×	×	×	×	×	×	-	×	×	-
B. japonicus	ALK7	KUHE:59643	Japan	Kochi	Aki	-	-	Lib. 1 and 2	SAMD00622870 and SAMD00622871	EJ	-	×	×	×	×	×	×	-	-	×	-
B. formosus	ALK9	KUHE:34845	Japan	Shiga	Koka	LC581650	SF	Lib. 1	SAMD00622872	SF	-	×	×	×	×	×	×	×	×	-	-
B. formosus	ALL0	KUHE:27792	Japan	Aomori	Nakadomari	LC581651	NF	Lib. 1	SAMD00622873	NF	-	×	×	×	×	×	×	×	-	-	-
B. formosus	ALL3	KUHE:21851	Japan	Tokyo	Kouzushima	LC581652	NF	Lib. 1	SAMD00622874	-	-	-	-	-	-	×	×	-	-	-	-
B. formosus	ALL4	KUHE:29976	Japan	Tokyo	Niijima	LC581653	NF	Lib. 1	SAMD00622875	-	-	-	-	-	-	×	×	-	-	-	-
hybrid	ALL6	KUHE:59642	Japan	Wakayama	Tanabe	LC581655	SF	Lib. 1	SAMD00622876	SF	-	×	×	×	×	×	×	-	×	-	-
B. formosus	ALY1	KUHE:43074	Japan	Akita	Nikaho	LC581658	NF	Lib. 1	SAMD00622877	NF	×	×	×	×	×	×	×	×	-	-	-
B. japonicus	ALZ2	KUHE: UN	Japan	Kagoshima	Satsumasendai	LC581666	WJ	Lib. 1 and 2	SAMD00622878 and SAMD00622879	WJ	-	×	×	×	×	×	×	-	-	×	×
B. japonicus	ALZ3	KUHE:TMP_KE0364	Japan	Fukuoka	Kitakyushu	LC581667	WJ	Lib. 1	SAMD00622880	WJ	×	×	×	×	×	×	×	-	-	×	×
B. japonicus	ALZ4	KUHE:30833	Japan	Tokushima	Anan	LC581668	EJ	Lib. 1	SAMD00622881	EJ	-	×	×	×	×	×	×	-	×	×	-
B. formosus	ALZ6	KUHE:59328	Japan	Hokkaido	Asasahikawa	LC581670	SF	Lib. 1	SAMD00622882	-	-	-	-	-	-	×	×	-	-	-	-
B. formosus	ALZ7	KUHE:59647	Japan	Hokkaido	Hakodate	LC581707	NF	Lib. 1	SAMD00622883	-	-	-	-	-	-	×	×	-	-	-	-
B. japonicus	ALZ8	KUHE:32014	Japan	Kagoshima	Yakushima	LC581671	WJ	Lib. 1 and 2	SAMD00622884 and SAMD00622885	WJ	-	×	-	×	-	×	-	-	-	-	-
B. japonicus	ALZ9	KUHE:56563	Japan	Kagoshima	Yakushima	LC581672	WJ	Lib. 1 and 2	SAMD00622886 and SAMD00622887	WJ	-	×	-	×	-	×	-	-	-	-	-
B. japonicus	AMB3	KUHE:TMP_20140423-2	Japan	Wakayama	Shirahama	LC581675	EJ	Lib. 1	SAMD00622888	EJ	-	×	×	×	×	×	×	-	×	×	×
B. formosus	AMC2	KUHE: UN	Japan	Ishikawa	Suzu	LC581683	SF	Lib. 1	SAMD00622889	SF	-	×	×	×	×	×	×	×	-	-	-
B. japonicus	AMC5	KUHE:TMP_20140519-1	Japan	Ehime	Yawatahama	LC581685	EJ	Lib. 1	SAMD00622890	EJ	-	×	×	×	×	×	×	-	-	×	-
B. japonicus	AMC8	KUHE: UN	Japan	Osaka	Mino	LC581687	EJ	Lib. 1	SAMD00622891	EJ	×	×	×	×	×	×	×	-	×	×	×
B. formosus	AMD3	KUHE:TMP_TS1827	Japan	Aichi	Tahara	LC581691	SF	Lib. 1	SAMD00622892	SF	-	×	×	×	×	×	×	×	×	-	-
hybrid	AMH9	KUHE:TMP_NY1684	Japan	Tokyo	Koto	LC581694	EJ	Lib. 1	SAMD00622893	-	-	-	-	-	-	×	×	-	-	-	-
B. formosus	AMJ0	KUHE:TMP_NY211	Japan	Tochigi	Kanuma	LC581695	NF	Lib. 1	SAMD00622894	NF	-	×	×	×	×	×	×	×	-	-	-
B. formosus	AMJ5	KUHE:TMP_NY1290	Japan	Fukushima	Tadami	LC581700	SF	Lib. 1	SAMD00622895	NF	-	×	×	×	×	×	×	×	-	-	-
B. formosus	AMK2	KUHE:TMP_NY2463	Japan	Yamagata	Nishiokitama	LC581708	NF	Lib. 1	SAMD00622896	NF	-	×	×	×	×	×	×	×	-	-	-
B. formosus	AMK3	KUHE:TMP_NY501	Japan	Yamagata	Tsuruoka	LC581709	NF	Lib. 1	SAMD00622897	NF	-	×	×	×	×	×	×	×	-	-	-
B. formosus	AMK4	KUHE:TMP_NY500	Japan	Yamagata	Akumi	LC581710	NF	Lib. 1	SAMD00622898	NF	-	×	×	×	×	×	×	×	-	-	-
hybrid	AMK5	KUHE:56760	Japan	Tokyo	Oshima	LC581711	SF	Lib. 1	SAMD00622899	-	-	-	-	-	-	×	×	-	-	-	-
B. formosus	AMK7	KUHE:49931	Japan	Fukushima	Inawashiro	LC581713	NF	Lib. 1	SAMD00622900	NF	-	×	×	×	×	×	×	×	-	-	-
B. torrenticola	AMK8	KUHE:TMP_20130729-1	Japan	Gifu	Gujo	LC581714	B. torrenticola	Lib. 1	SAMD00622901	B. torrenticola	-	×	×	-	-	-	-	-	-	-	-
hybrid	AND3	KUHE:3669	Japan	Kyoto	Nantan	-	-	Lib. 1	SAMD00622902	SF	-	×	×	×	×	×	×	-	×	-	-
B. japonicus	AND7	KUHE:59331	Japan	Kyoto	Fukuchiyama	-	-	Lib. 1	SAMD00622903	EJ	-	×	×	×	×	×	×	-	×	×	×
hybrid	ANE4	KUHE:59530	Japan	Kyoto	Kyoto	-	-	Lib. 1	SAMD00622904	EJ	-	×	×	×	×	×	×	-	×	-	-
hybrid	ANE6	KUHE:59600	Japan	Kyoto	Kameoka	-	-	Lib. 1	SAMD00622905	EJ	-	×	×	×	×	×	×	-	×	-	-
hybrid	ANE8	KUHE:59710	Japan	Kyoto	Kyoto	-	-	Lib. 1	SAMD00622906	SF	-	×	×	×	×	×	×	-	×	-	-
hybrid	ANF7	KUHE:59720	Japan	Kyoto	Kyoto	-	-	Lib. 1	SAMD00622907	SF	-	×	×	×	×	×	×	-	×	-	-
hybrid	ANF8	KUHE:59721	Japan	Kyoto	Kyoto	-	-	Lib. 1	SAMD00622908	EJ	-	×	×	×	×	×	×	-	×	-	-
B. japonicus	ANS3	KUHE:TMP_KPC319	Japan	Nagasaki	Iki	LC581717	WJ	Lib. 1	SAMD00622909	WJ	-	×	×	×	×	×	×	-	-	×	×
hybrid	ANS4	KUHE:60025	Japan	Kanagawa	Yokohama	LC581718	SF	Lib. 1	SAMD00622910	-	-	-	-	-	-	×	×	-	-	-	-
B. japonicus	ANS7	KUHE:TMP_NY1703	Japan	Nagasaki	Nagasaki	LC581721	WJ	Lib. 1	SAMD00622911	WJ	×	×	×	×	×	×	×	-	-	×	×
B. formosus	ANS8	KUHE:TMP_NY1289	Japan	Fukushima	Tadami	LC581722	NF	Lib. 1	SAMD00622912	NF	-	×	×	×	×	×	×	×	-	-	-
B. formosus	ANT7	KUHE:TMP_NY2143	Japan	Fukushima	Tadami	LC581730	SF	Lib. 1	SAMD00622913	NF	-	×	×	×	×	×	×	×	-	-	-
B. formosus	ANT8	KUHE:TMP_NY2144	Japan	Fukushima	Tadami	LC581731	NF	Lib. 1	SAMD00622914	NF	-	×	×	×	×	×	×	×	-	-	-
B. formosus	ANU2	KUHE:27584	Japan	Aomori	Higashidori	LC581733	NF	Lib. 1	SAMD00622915	NF	×	×	×	×	×	×	×	×	-	-	-
B. japonicus	ANU4	KUHE:27681	Japan	Miyazaki	Kobayashi	LC581734	WJ	Lib. 1	SAMD00622916	WJ	×	×	×	×	×	×	×	-	-	×	×
B. formosus	ANU5	KUHE:27748	Japan	Iwate	Kamaishi	LC581735	NF	Lib. 1	SAMD00622917	NF	×	×	×	×	×	×	×	×	-	-	-
B. formosus	AOA4	KUHE:TMP_MY140508-1	Japan	Yamanashi	Yamanashi	LC581737	SF	Lib. 1	SAMD00622918	SF	-	×	×	×	×	×	×	×	-	-	-
B. japonicus	AOB0	KUHE:3186	Japan	Kagawa	Talamatsu	LC581740	EJ	Lib. 1	SAMD00622919	EJ	-	×	×	×	×	×	×	-	×	×	-
hybrid	AOB1	KUHE:TMP_HA-B-1	Japan	Tokyo	Hachijo	LC581741	SF	Lib. 1	SAMD00622920	-	-	-	-	-	-	×	×	-	-	-	-
B. japonicus	AOB4	KUHE:3929	Japan	Kumamoto	Amakusa	LC581744	WJ	Lib. 1	SAMD00622921	WJ	-	×	×	×	×	×	×	-	-	×	×
B. formosus	AOB5	KUHE:3301	Japan	Gunma	Tatebayashi	LC581745	SF	Lib. 1	SAMD00622922	SF	-	×	×	×	×	×	×	×	-	-	-
B. formosus	AOB9	KUHE:3189	Japan	Saitama	Tokorozawa	LC581749	SF	Lib. 1	SAMD00622923	NF	-	×	×	×	×	×	×	×	-	-	-
B. formosus	APD4	KUHE:60487	Japan	Yamagata	Nishimurayama	-	-	Lib. 1	SAMD00622924	NF	-	×	×	×	×	×	×	×	-	-	-
B. japonicus	APH7	KUHE:60494	Japan	Yamaguchi	Hagi	LC581535	EJ	Lib. 1	SAMD00622925	WJ	-	×	×	×	×	×	×	-	-	×	×
B. japonicus	APH8	KUHE:60495	Japan	Yamaguchi	Yanai	LC581751	EJ	Lib. 1	SAMD00622926	EJ	-	×	×	×	×	×	×	-	-	×	-
B. japonicus	APJ1	KUHE:60498	Japan	Yamaguchi	Yamaguchi	-	-	Lib. 1	SAMD00622927	WJ	-	×	×	×	×	×	×	-	-	×	×
B. japonicus	APJ5	KUHE:60502	Japan	Yamaguchi	Shimonoseki	-	-	Lib. 1	SAMD00622928	WJ	-	×	×	×	×	×	×	-	-	×	×
B. japonicus	APJ6	KUHE:60503	Japan	Yamaguchi	Hagi	-	-	Lib. 1	SAMD00622929	EJ	-	×	×	×	×	×	×	-	-	×	×
B. japonicus	APJ8	KUHE:60505	Japan	Yamaguchi	Yamaguchi	-	-	Lib. 1	SAMD00622930	EJ	-	×	×	×	×	×	×	-	-	×	×
B. japonicus	APK0	KUHE:60507	Japan	Yamaguchi	Shunan	-	-	Lib. 1	SAMD00622931	EJ	-	×	×	×	×	×	×	-	-	×	×
B. japonicus	APK2	KUHE:60509	Japan	Yamaguchi	Iwakuni	LC581753	EJ	Lib. 1	SAMD00622932	EJ	-	×	×	×	×	×	×	-	-	×	×
B. japonicus	APK3	KUHE:60510	Japan	Shimane	Kanoashi	-	-	Lib. 1	SAMD00622933	EJ	-	×	×	×	×	×	×	-	-	×	×
B. japonicus	APK4	KUHE:60511	Japan	Shimane	Kanoashi	-	-	Lib. 1	SAMD00622934	EJ	-	×	×	×	×	×	×	-	-	×	×
B. japonicus	APK5	KUHE:60512	Japan	Yamaguchi	Yamaguchi	-	-	Lib. 1	SAMD00622935	EJ	-	×	×	×	×	×	×	-	-	×	×
B. japonicus	APK6	KUHE:60513	Japan	Yamaguchi	Abu	-	-	Lib. 1	SAMD00622936	EJ	-	×	×	×	×	×	×	-	-	×	×
B. formosus	APZ3	KUHE:60388	Japan	Ibaraki	Tsukuba	-	-	Lib. 1	SAMD00622937	SF	-	×	×	×	×	×	×	×	-	-	-
B. formosus	APZ4	KUHE:60458	Japan	Iwate	Takizawa	-	-	Lib. 1	SAMD00622938	NF	-	×	×	×	×	×	×	×	-	-	-
B. japonicus	APZ5	KUHE:60571	Japan	Kagawa	Marugame	-	-	Lib. 1	SAMD00622939	EJ	-	×	×	×	×	×	×	-	×	×	-
B. japonicus	APZ6	KUHE:60518	Japan	Kagoshima	Satsuma	-	-	Lib. 1	SAMD00622940	WJ	-	×	×	×	×	×	×	-	-	×	×
B. japonicus	APZ7	KUHE:60569	Japan	Kyoto	Miyazu	-	-	Lib. 1	SAMD00622941	EJ	-	×	×	×	×	×	×	-	×	×	×
B. torrenticola	APZ8	KUHE:60488	Japan	Kyoto	Nantan	-	-	Lib. 1	SAMD00622942	B. torrenticola	-	×	×	-	-	-	-	-	-	-	-
hybrid	APZ9	KUHE:60486	Japan	Shiga	Nagahama	-	-	Lib. 1	SAMD00622943	SF	-	×	×	×	×	×	×	-	×	-	-
B. formosus	AQA0	KUHE:60372	Japan	Niigata	Uonuma	-	-	Lib. 1	SAMD00622944	NF	-	×	×	×	×	×	×	×	-	-	-
B. japonicus	AQA1	KUHE:60355	Japan	Hyogo	Himeji	-	-	Lib. 1	SAMD00622945	EJ	-	×	×	×	×	×	×	-	×	×	×
B. japonicus	ARR3	KUHE:4011	Japan	Kochi	Kochi	-	-	Lib. 1	SAMD00622946	EJ	-	×	×	×	×	×	×	-	×	×	-
B. japonicus	ARR4	KUHE:33896	Japan	Saga	Saga	-	-	Lib. 2	SAMD00622947	WJ	-	×	×	×	×	×	×	-	-	×	×
B. japonicus	AZA8	KUHE:43351	Japan	Kagoshima	Yakushima	-	-	Lib. 2	SAMD00622948	WJ	-	×	-	×	-	×	-	-	-	-	-
B. japonicus	AZA9	KUHE:32111	Japan	Kagoshima	Yakushima	-	-	Lib. 2	SAMD00622949	WJ	-	×	-	×	-	×	-	-	-	-	-
B. japonicus	AZB0	KUHE:32112	Japan	Kagoshima	Yakushima	-	-	Lib. 2	SAMD00622950	WJ	-	×	-	×	-	×	-	-	-	-	-
B. japonicus	AZB1	KUHE:61358	Japan	Kagoshima	Yakushima	-	-	Lib. 2	SAMD00622951	WJ	-	×	-	×	-	×	-	-	-	-	-
B. japonicus	AZB2	KUHE:30294	Japan	Kagoshima	Yakushima	-	-	Lib. 2	SAMD00622952	WJ	-	×	-	×	-	×	-	-	-	-	-
B. japonicus	AZB3	KUHE:32109	Japan	Kagoshima	Yakushima	-	-	Lib. 2	SAMD00622953	WJ	-	×	-	×	-	×	-	-	-	-	-
B. japonicus	AZB4	KUHE:58979	Japan	Kagoshima	Yakushima	-	-	Lib. 2	SAMD00622954	WJ	-	×	×	×	×	×	×	-	-	×	×
B. japonicus	AZB5	KUHE:61176	Japan	Kagoshima	Yakushima	-	-	Lib. 2	SAMD00622955	WJ	-	×	-	×	-	×	-	-	-	-	-
B. japonicus	AZB8	KUHE:33344	Japan	Kagoshima	Yakushima		-	Lib. 2	SAMD00622956	WJ	-	×	-	×	-	×	-	-	-	-	-
B. japonicus	AZB9	KUHE:43352	Japan	Kagoshima	Yakushima	-	-	Lib. 2	SAMD00622957	WJ	-	×	-	×	-	×	-	-	-	-	-
B. japonicus	AZC0	KUHE:56562	Japan	Kagoshima	Yakushima	-	-	Lib. 2	SAMD00622958	WJ	-	×	-	×	-	×	-	-	-	-	-
B. japonicus	AZC1	KUHE:56561	Japan	Kagoshima	Yakushima	-	-	Lib. 2	SAMD00622959	WJ	-	×	-	×	-	×	-	-	-	-	-
B. japonicus	AZC2	KUHE:32113	Japan	Kagoshima	Yakushima	-	-	Lib. 2	SAMD00622960	WJ	-	×	-	×	-	×	-	-	-	-	-
B. japonicus	AZC3	KUHE:32114	Japan	Kagoshima	Yakushima	-	-	Lib. 2	SAMD00622961	WJ	-	×	-	×	-	×	-	-	-	-	-
B. japonicus	AZC4	KUHE:TMP_20190513-4	Japan	Kagoshima	Yakushima	-	-	Lib. 2	SAMD00622962	WJ	-	×	-	×	-	×	-	-	-	-	-
B. japonicus	AZC5	KUHE:61357	Japan	Kagoshima	Yakushima	-	-	Lib. 2	SAMD00622963	WJ	-	×	-	×	-	×	-	-	-	-	-
B. japonicus	AZC6	KUHE:61349	Japan	Kagoshima	Yakushima	-	-	Lib. 2	SAMD00622964	WJ	-	×	-	×	-	×	-	-	-	-	-
B. japonicus	AZC7	KUHE:56559	Japan	Kagoshima	Yakushima	-	-	Lib. 2	SAMD00622965	WJ	-	×	×	×	×	×	×	-	-	×	×
B. japonicus	AZC8	KUHE:56560	Japan	Kagoshima	Yakushima	-	-	Lib. 2	SAMD00622966	WJ	-	×	-	×	-	×	-	-	-	-	-
B. japonicus	AZC9	KUHE:31471	Japan	Kagoshima	Yakushima	-	-	Lib. 2	SAMD00622967	WJ	-	×	×	×	×	×	×	-	-	×	×
B. japonicus	AZD0	KUHE:32015	Japan	Kagoshima	Yakushima	-	-	Lib. 2	SAMD00622968	WJ	-	×	-	×	-	×	-	-	-	-	-
B. japonicus	AZD1	KUHE:32016	Japan	Kagoshima	Yakushima	-	-	Lib. 2	SAMD00622969	WJ	-	×	-	×	-	×	-	-	-	-	-
B. japonicus	AZD6	KUHE:3718	Japan	Kagoshima	Tanegashima	-	-	Lib. 2	SAMD00622970	WJ	-	×	-	×	-	×	-	-	-	-	-
B. japonicus	AZD7	KUHE:3719	Japan	Kagoshima	Tanegashima	-	-	Lib. 2	SAMD00622971	WJ	-	×	-	×	-	×	-	-	-	-	-
B. japonicus	AZD8	KUHE:30901	Japan	Kagoshima	Tanegashima	-	-	Lib. 2	SAMD00622972	WJ	-	×	-	×	-	×	-	-	-	-	-
B. japonicus	AZD9	KUHE:30902	Japan	Kagoshima	Tanegashima	-	-	Lib. 2	SAMD00622973	WJ	-	×	×	×	×	×	×	-	-	×	×
B. japonicus	AZE0	KUHE:30903	Japan	Kagoshima	Tanegashima	-	-	Lib. 2	SAMD00622974	WJ	-	×	-	×	-	×	-	-	-	-	-
B. japonicus	AZE1	KUHE:30351	Japan	Kagoshima	Kimotsuki	-	-	Lib. 2	SAMD00622975	WJ	-	×	×	×	×	×	×	-	-	×	×
B. japonicus	AZE3	KUHE:60517	Japan	Kagoshima	Satsumasendai	-	-	Lib. 2	SAMD00622976	WJ	-	×	×	×	×	×	×	-	-	×	×
B. japonicus	AZE6	KUHE:29226	Japan	Kagoshima	Yakushima	-	-	Lib. 2	SAMD00622977	WJ	-	×	-	×	-	×	-	-	-	-	-
B. japonicus	AZF0	KUHE:31486	Japan	Kagoshima	Kagoshima	-	-	Lib. 2	SAMD00622978	WJ	-	×	×	×	×	×	×	-	-	×	×
B. japonicus	RZ2	KUHE:TMP_120229-4	Japan	Nagasaki	Goto	LC581754	WJ	Lib. 1	SAMD00622979	WJ	-	×	×	×	×	×	×	-	-	×	×
B. japonicus	RZ3	KUHE:45485	Japan	Kagoshima	Kimotsuki	LC581755	WJ	Lib. 1 and 2	SAMD00622980 and SAMD00622981	WJ	-	×	×	×	×	×	×	-	-	×	×
hybrid	UT1	KUHE:46584	Japan	Tokyo	Itabashi	LC581757	SF	Lib. 1	SAMD00622982	-	-	-	-	-	-	×	×	-	-	-	-
